# Supplementary material for: MR susceptibility contrast imaging using a 2D simultaneous multi-slice gradient-echo sequence at 7T
Source: PLoS One. 2019 Jul 17;14(7):e0219705. doi: 10.1371/journal.pone.0219705 (PMC6636815; doi:10.1371/journal.pone.0219705)
Supplement: S1 File — (XLSX) [file pone.0219705.s001.xlsx]

## Sheet: Volunteer Demographic Info
Volunteer	Gender	Age
1	F	30
2	F	59
3	M	61
4	M	54
5	F	60
6	F	30
7	M	33
8	M	34
9	M	27
10	F	30
11	F	33
	Mean	41
	STDEV	14.1067
