# Supplementary material for: MR susceptibility contrast imaging using a 2D simultaneous multi-slice gradient-echo sequence at 7T
Source: PLoS One. 2019 Jul 17;14(7):e0219705. doi: 10.1371/journal.pone.0219705 (PMC6636815; doi:10.1371/journal.pone.0219705)
Supplement: S2 File — (XLSX) [file pone.0219705.s002.xlsx]

## Sheet: Patient Clinical Info
Patient	Sex	Age	MS Type	Disease Duration	EDSS
1	M	30	RR	1 year	3
2	F	58	SP	31 years	7
3	M	37	RR	1 year	2
4	M	46	RR	16 years	6
EDSS=Estimated Disability Status Scal
RR=Relapse Remitting
SP=Secondary Progressive
