# Supplementary material for: MR susceptibility contrast imaging using a 2D simultaneous multi-slice gradient-echo sequence at 7T
Source: PLoS One. 2019 Jul 17;14(7):e0219705. doi: 10.1371/journal.pone.0219705 (PMC6636815; doi:10.1371/journal.pone.0219705)
Supplement: S3 File — (XLSX) [file pone.0219705.s003.xlsx]

## Sheet: Signal to Noise Ratio
	SNR: WM		SNR: GM
Volunteer	2D	3D	2D	3D
1	17.2137	17.2763	18.881	18.2701
2	14.5711	21.8955	15.3816	22.5968
3	18.7553	28.3569	20.1207	28.5205
4	12.0287	17.1094	12.4905	17.8266
5	14.0077	21.5581	15.4639	22.3734
6	15.6009	17.2622	16.6602	18.475
7	20.3942	23.816	23.0639	25.6464
8	28.8371	28.1128	30.5882	28.8986
9	14.7659	15.03	15.7881	15.0455
10	25.2914	26.5831	27.2153	27.3752
11	29.3641	30.9332	31.5369	31.6291
Mean	19.1664	22.5394	20.6537	23.3325
STDEV	6.09322	5.44193	6.56062	5.45988
