# Supplementary material for: MR susceptibility contrast imaging using a 2D simultaneous multi-slice gradient-echo sequence at 7T
Source: PLoS One. 2019 Jul 17;14(7):e0219705. doi: 10.1371/journal.pone.0219705 (PMC6636815; doi:10.1371/journal.pone.0219705)
Supplement: S4 File — (XLSX) [file pone.0219705.s004.xlsx]

## Sheet: CNR Magnitude
	CNR: GM/WM		CNR: GP/Pu		CNR: GP/IC
Volunteer	2D	3D	2D	3D	2D	3D
1	1.66735	0.993838	2.76287	2.78368	3.89514	4.41744
2	0.810504	0.701313	0.799366	0.491792	3.83324	3.29663
3	1.36539	0.163601	2.27497	1.81378	3.92394	2.68874
4	0.461792	0.717162	0.930332	1.70355	3.06167	3.12738
5	1.45617	0.81521	4.33362	3.43265	4.94011	3.68364
6	1.05927	1.21281	2.55029	2.14018	3.3181	2.37723
7	2.66974	1.83034	4.87683	3.68081	5.59073	4.75565
8	1.75102	0.785879	1.88664	1.72909	3.64836	3.86025
9	1.02217	0.0154321	2.05972	1.55605	5.65086	4.84953
10	1.92385	0.792078	3.62362	2.78578	4.87728	4.36841
11	2.17284	0.695874	2.49679	2.26	3.20913	3.11813
Mean	1.48728	0.793049	2.59955	2.21612	4.17714	3.68573
STDEV	0.639201	0.481409	1.27332	0.913805	0.93291	0.838008

## Sheet: CNR QSM
	CNR: GM/WM		CNR: GP/Pu		CNR: GP/IC
Volunteer	2D	3D	2D	3D	2D	3D
1	1.48595	1.85081	1.16459	0.536103	4.34988	3.04105
2	2.10835	3.04393	0.390442	0.241889	4.83206	3.91485
3	4.87429	3.12116	1.2666	0.612945	4.31374	4.6888
4	4.05053	4.80726	0.63708	1.00228	2.45136	3.65433
5	1.30964	4.1069	1.85575	1.86291	4.12709	3.86724
6	4.24496	3.02055	1.96402	2.0885	4.14565	4.51638
7	1.86328	2.19838	2.49932	1.98832	5.83039	5.33196
8	4.90397	3.8612	1.67225	1.18586	6.08796	4.6875
9	2.01791	2.35844	0.892464	0.638148	4.58483	4.05887
10	1.42348	1.80357	2.0948	1.30788	5.59795	4.69456
11	1.60022	6.01425	1.43634	1.27876	3.16182	3.90344
Mean	2.7166	3.28968	1.44306	1.15851	4.49843	4.21445
STDEV	1.46814	1.31221	0.648396	0.625106	1.09197	0.635699

## Sheet: CNR Phase
	CNR: GM/WM		CNR: GP/Pu		CNR: GP/IC
Volunteer	2D	3D	2D	3D	2D	3D
1	3.56756	3.08716	0.423628	0.287521	2.77098	2.66145
2	1.99975	2.17693	0.837433	0.944154	3.03513	3.26145
3	3.289	3.93668	0.363075	0.212716	4.08269	3.67127
4	3.89343	4.19172	0.15442	0.282847	2.20846	2.65616
5	2.4436	2.66153	0.200578	0.395536	2.80697	2.55254
6	4.11889	1.49007	1.05122	0.0465537	3.35738	0.671058
7	2.88433	2.24291	0.846127	0.789675	3.87021	3.90958
8	3.66287	2.76651	0.13861	0.286838	3.32839	2.97992
9	3.64332	3.51035	0.20203	0.0897734	3.24111	3.8618
10	2.84813	2.67997	0.639537	0.662696	3.63886	4.09256
11	2.28686	4.24556	0.350382	0.325795	3.06555	3.50427
Mean	3.14889	2.99904	0.473367	0.393101	3.2187	3.07473
STDEV	0.701446	0.889891	0.320096	0.285899	0.531692	0.966073

## Sheet: CNR R2Star
	CNR: GM/WM		CNR: GP/Pu		CNR: GP/IC
Volunteer	2D	3D	2D	3D	2D	3D
1	0.522492	0.342632	1.40665	4.33939	3.74243	6.99713
2	0.630802	0.474798	0.671957	2.06447	7.73251	8.80528
3	0.301128	0.349855	1.65654	2.8802	5.16345	5.76957
4	0.710496	0.837605	0.0021301	1.15264	1.45851	2.89926
5	0.290767	0.0722063	2.65536	2.99525	6.09489	4.73629
6	0.34915	1.26207	1.97502	2.96333	4.4697	4.68474
7	0.465455	0.122872	3.92235	5.10109	6.11722	7.70609
8	0.472716	0.00250957	2.45651	2.68757	6.25716	7.41068
9	0.158327	0.625208	0.676694	1.30152	6.31145	8.09833
10	1.36161	1.347	7.13278	6.11886	11.6461	10.1383
11	0.065408	1.10884	2.07178	3.08994	5.96552	5.67896
Mean	0.484396	0.595054	2.23889	3.15402	5.90535	6.62951
STDEV	0.348604	0.481642	1.95021	1.51555	2.52451	2.09837
