# Supplementary material for: MR susceptibility contrast imaging using a 2D simultaneous multi-slice gradient-echo sequence at 7T
Source: PLoS One. 2019 Jul 17;14(7):e0219705. doi: 10.1371/journal.pone.0219705 (PMC6636815; doi:10.1371/journal.pone.0219705)
Supplement: S5 File — (XLSX) [file pone.0219705.s005.xlsx]

## Sheet: MS Lesion Contrast Rating
		Magnitude		Phase		QSM		R2*
Patient	Lesion	2D	3D	2D	3D	2D	3D	2D	3D
1	1	3	2	1	1	2	2	4	4
1	2	4	4	4	3	4	4	4	4
1	3	4	4	4	4	4	4	4	4
1	4	3	1	1	1	1	1	1	1
1	5	3	2	1	1	1	1	2	2
1	6	4	2	1	1	1	1	4	4
1	7	4	4	2	2	2	2	3	3
1	8	4	4	1	1	1	1	3	3
1	9	4	3	4	4	4	4	4	4
1	10	4	2	3	2	1	1	2	2
1	11	4	3	3	2	2	1	4	4
1	12	4	3	1	1	1	1	3	3
1	13	4	4	4	3	4	3	4	4
1	14	3	2	1	1	1	1	3	2
1	15	4	3	2	1	1	1	4	4
1	16	4	4	3	3	3	3	4	4
1	17	4	4	3	1	3	2	3	3
1	18	4	4	3	2	2	2	4	4
1	19	4	4	1	1	1	1	3	2
1	20	4	3	1	1	1	1	1	1
1	21	4	4	3	2	3	2	4	4
1	22	3	2	2	2	2	3	4	4
1	23	4	1	2	2	2	2	4	4
1	24	4	3	1	1	1	1	4	4
1	25	3	2	1	1	1	1	4	4
1	26	4	1	4	4	4	4	4	4
1	27	4	4	4	4	4	4	4	4
1	28	3	2	2	1	1	1	4	4
1	29	4	3	1	1	1	1	4	3
1	30	4	4	3	3	3	3	2	3
1	31	4	4	3	2	3	2	3	4
1	32	4	3	1	1	3	2	4	4
1	33	4	4	2	1	2	1	2	3
1	34	3	1	1	1	1	1	2	2
1	35	4	3	3	3	3	3	4	4
1	36	2	1	4	4	4	4	4	4
1	37	4	4	3	3	4	4	4	4
1	38	3	2	3	2	4	3	2	4
1	39	3	2	4	3	3	2	3	2
1	40	3	2	1	1	1	1	2	2
1	41	3	3	4	4	4	4	2	2
1	42	4	3	1	1	1	1	3	3
1	43	4	4	2	2	2	2	2	2
1	44	3	3	4	4	4	4	2	2
1	45	4	4	3	3	3	3	4	4
1	46	3	2	2	2	1	1	3	3
1	47	4	3	4	4	4	3	4	4
1	48	4	3	4	3	4	3	3	4
1	49	4	3	3	2	3	2	4	4
1	50	4	4	3	3	3	3	4	4
1	51	4	4	3	3	2	2	4	4
1	52	4	4	4	4	4	4	3	3
1	53	4	4	3	2	2	2	4	4
1	54	4	4	4	3	4	3	4	4
1	55	4	4	1	1	1	1	4	4
1	56	3	2	1	1	1	1	1	1
1	57	4	2	1	1	1	1	4	4
2	1	3	1	1	1	1	1	3	4
2	2	4	4	4	4	4	4	4	4
2	3	4	2	3	3	4	3	4	3
2	4	3	2	1	1	1	1	3	3
2	5	4	4	4	4	4	3	4	4
2	6	3	2	4	4	4	4	4	4
2	7	4	3	2	2	1	1	4	4
2	8	3	3	1	1	1	1	3	3
2	9	4	4	1	1	1	1	2	4
2	10	3	3	1	1	3	1	3	4
2	11	4	4	4	4	4	4	4	4
2	12	4	3	2	2	3	2	4	4
2	13	4	4	3	3	3	3	4	4
2	14	3	2	1	1	1	1	2	2
2	15	4	4	2	2	2	1	4	4
2	16	4	4	1	1	1	1	4	4
2	17	3	3	1	1	1	1	3	2
2	18	3	3	1	1	1	1	2	2
2	19	4	4	1	1	1	1	4	4
2	20	4	2	1	2	1	1	4	4
2	21	3	3	1	1	1	1	3	4
2	22	4	3	1	1	1	1	4	4
2	23	3	2	2	1	2	2	4	4
2	24	4	4	2	2	2	2	4	4
2	25	4	4	1	1	1	1	4	4
2	26	4	3	4	4	4	4	4	4
2	27	3	2	1	1	1	1	2	4
2	28	3	2	1	1	1	1	3	3
2	29	3	3	1	1	1	1	1	3
3	1	3	3	4	4	4	4	3	3
3	2	3	3	4	4	4	4	4	4
3	3	3	3	4	4	4	4	2	4
3	4	2	2	4	4	4	4	4	4
3	5	3	2	4	4	4	4	3	2
3	6	1	2	4	4	4	4	1	2
3	7	2	2	4	4	4	4	2	2
3	8	3	3	4	4	4	4	4	4
3	9	3	3	4	4	4	4	1	1
3	10	3	3	4	4	4	4	1	1
3	11	2	2	4	4	4	4	1	1
3	12	2	1	4	4	4	4	1	1
3	13	1	2	4	4	4	4	1	1
3	14	2	1	4	4	4	4	4	3
3	15	3	3	4	4	4	4	2	2
3	16	2	2	4	4	4	4	4	4
3	17	4	4	4	4	4	4	4	4
3	18	4	4	4	4	4	4	2	3
3	19	1	1	4	4	3	3	1	1
3	20	3	3	4	4	4	4	3	3
3	21	1	1	4	4	3	4	2	3
3	22	2	2	4	4	4	4	3	1
3	23	1	1	4	4	4	4	1	1
3	24	4	2	4	4	4	4	4	3
3	25	1	1	3	3	3	3	1	1
3	26	3	2	4	4	4	4	2	2
3	27	2	2	4	4	4	3	3	2
3	28	3	3	4	4	4	4	1	1
3	29	3	3	4	4	4	4	2	1
3	30	4	4	4	4	4	4	4	4
3	31	1	1	4	4	4	4	1	2
3	32	3	3	4	4	4	4	4	3
3	33	2	2	3	3	2	3	2	2
3	34	1	1	2	2	3	3	1	1
4	1	4	3	3	2	3	3	2	2
4	2	4	4	2	2	2	2	3	3
4	3	4	3	1	1	1	1	4	3
4	4	4	4	2	2	3	2	4	4
4	5	4	3	1	1	1	1	2	3
4	6	4	4	1	1	1	1	2	3
4	7	4	4	3	1	3	1	4	4
4	8	4	4	4	4	4	4	4	4
4	9	3	3	1	1	1	1	2	3
4	10	2	2	1	1	1	1	2	2
4	11	4	4	1	1	1	2	2	2
4	12	4	3	1	1	1	1	3	2
	Mean	3.33333	2.84091	2.61364	2.45455	2.59091	2.44697	3.01515	3.07576
	STDEV	0.870787	0.994869	1.29384	1.29805	1.30738	1.29187	1.08413	1.06736
Scale
1	Poor	Not visible or barely visible with aid of corroborating sequences
2	Fair	Faintly visible with limited contrast between lesion and normal-appearing tissue
3	Good	Visible with good contrast between lesion and adjacent normal-appearing tissue
4	Excellent	Cleary visible with strong contrast between lesion and adjacent normal-apearring tissue
